# Supplementary material
Source: publisher figshare collection journal article supplement (https://acs.figshare.com/ndownloader/files/9796564)
Supplement: Supplementary file 1 [file 9796564]

## Sheet: Sheet1
Table S3. PEAKS proteins detected from EDTA extraction. Blue are unique to EDTA fraction. Orange are contaminants.
Accession	-10lgP	Coverage (%)	#Peptides	#Unique	PTM	Avg. Mass	Description
tr|F1Q3I5|F1Q3I5_CANLF	464.65	72	364	6	Carbamidomethylation; Oxidation (M); Deamidation (NQ); Oxidation or Hydroxylation; Carbamidomethylation (DHKE X@N-term); 33 more	139101	Collagen alpha-1(I) chain OS=Canis lupus familiaris GN=COL1A1 PE=4 SV=2
Q9XSJ7|CO1A1_CANLF	463.91	72	360	2	Carbamidomethylation; Oxidation (M); Deamidation (NQ); Oxidation or Hydroxylation; Carbamidomethylation (DHKE X@N-term); 33 more	138762	Collagen alpha-1(I) chain OS=Canis lupus familiaris GN=COL1A1 PE=1 SV=1
tr|F1PHY1|F1PHY1_CANLF	408.89	67	284	282	Oxidation (M); Deamidation (NQ); Oxidation or Hydroxylation; Carbamidomethylation (DHKE X@N-term); Acetylation (K); 24 more	129445	Collagen alpha-2(I) chain OS=Canis lupus familiaris GN=COL1A2 PE=4 SV=1
tr|E2QUV3|E2QUV3_CANLF	227.84	37	40	40	Carbamidomethylation; Oxidation (M); Deamidation (NQ); Oxidation or Hydroxylation; Carbamidomethylation (DHKE X@N-term); 7 more	39248	Uncharacterized protein OS=Canis lupus familiaris GN=AHSG PE=3 SV=2
tr|F1PDX0|F1PDX0_CANLF	169.48	45	21	20	Carbamidomethylation; Deamidation (NQ); Oxidation or Hydroxylation; Carbamidomethylation (DHKE X@N-term); Dehydration; 17 more	11207	Osteocalcin OS=Canis lupus familiaris GN=BGLAP PE=3 SV=1
tr|O77753|O77753_CANLF	137.77	18	22	11	Carbamidomethylation; Deamidation (NQ); Oxidation or Hydroxylation; Carbamidomethylation (DHKE X@N-term); Dehydration; 7 more	141875	Type IIA procollagen OS=Canis lupus familiaris PE=2 SV=2
tr|F1PG08|F1PG08_CANLF	117.73	9	8	8	Carbamidomethylation; Deamidation (NQ); Oxidation or Hydroxylation; Carbamidomethylation (DHKE X@N-term); Dihydroxy; 2 more	144813	Uncharacterized protein OS=Canis lupus familiaris GN=COL5A2 PE=4 SV=2
tr|F1PTY1|F1PTY1_CANLF	109.51	16	11	11	Oxidation or Hydroxylation; Carbamidomethylation (DHKE X@N-term); Methyl ester; Formylation; Deoxy; 2 more	63714	Keratin type II cytoskeletal 1 OS=Canis lupus familiaris GN=KRT1 PE=3 SV=1
Q6EIY9|K2C1_CANLF	109.51	16	11	11	Oxidation or Hydroxylation; Carbamidomethylation (DHKE X@N-term); Methyl ester; Formylation; Deoxy; 2 more	63790	Keratin type II cytoskeletal 1 OS=Canis lupus familiaris GN=KRT1 PE=2 SV=1
tr|E2RRM2|E2RRM2_CANLF	98.62	16	6	6	Carbamidomethylation; Deamidation (NQ); Oxidation or Hydroxylation; HexNAcylation (N); Acetylation (N-term)	67784	Uncharacterized protein OS=Canis lupus familiaris GN=F2 PE=3 SV=2
tr|J9NSF9|J9NSF9_CANLF	98.62	16	6	6	Carbamidomethylation; Deamidation (NQ); Oxidation or Hydroxylation; HexNAcylation (N); Acetylation (N-term)	70304	Prothrombin OS=Canis lupus familiaris GN=F2 PE=3 SV=1
tr|F1Q4A3|F1Q4A3_CANLF	97.09	8	3	3	Carbamidomethylation; Oxidation (M); Deamidation (NQ)	54664	Uncharacterized protein OS=Canis lupus familiaris GN=F10 PE=3 SV=2
P06872|TRY2_CANLF	92.4	19	10	10	Oxidation (M); Deamidation (NQ); Oxidation or Hydroxylation; Mutation	26423	Anionic trypsin OS=Canis lupus familiaris PE=2 SV=1
tr|E2RMA3|E2RMA3_CANLF	79.24	23	5	5	Carbamidomethylation; Deamidation (NQ); Carbamidomethylation (DHKE X@N-term)	34557	Uncharacterized protein OS=Canis lupus familiaris GN=SPARC PE=4 SV=1
tr|F1PUM6|F1PUM6_CANLF	79.02	15	4	4	Carbamidomethylation; Oxidation or Hydroxylation; Carbamidomethylation (DHKE X@N-term); Acetylation (N-term)	53706	Uncharacterized protein OS=Canis lupus familiaris GN=VTN PE=4 SV=1
tr|F1PYU9|F1PYU9_CANLF	77.55	14	5	5	Carbamidomethylation; Oxidation (M); Deamidation (NQ); Mutation	57685	Keratin type I cytoskeletal 10 OS=Canis lupus familiaris GN=KRT10 PE=3 SV=2
Q6EIZ0|K1C10_CANLF	77.55	14	5	5	Carbamidomethylation; Oxidation (M); Deamidation (NQ); Mutation	57711	Keratin type I cytoskeletal 10 OS=Canis lupus familiaris GN=KRT10 PE=2 SV=1
tr|E2RQP5|E2RQP5_CANLF	76.94	20	3	3	Carbamidomethylation; Deamidation (NQ); Methyl ester	23138	Uncharacterized protein OS=Canis lupus familiaris GN=SPP2 PE=4 SV=1
tr|F1PD34|F1PD34_CANLF	76.94	20	3	3	Carbamidomethylation; Deamidation (NQ); Methyl ester	22761	Uncharacterized protein OS=Canis lupus familiaris GN=SPP2 PE=4 SV=2
tr|Q9TT28|Q9TT28_CANLF	70.77	82	4	3	Deamidation (NQ); Mutation	3807	Osteocalcin (Fragment) OS=Canis lupus familiaris GN=gla PE=2 SV=1
tr|E2RPQ6|E2RPQ6_CANLF	65.23	24	3	3	Carbamidomethylation; Deamidation (NQ); Phosphorylation (STY); Acetylation (N-term)	24024	Uncharacterized protein OS=Canis lupus familiaris GN=DPT PE=4 SV=1
tr|E5G725|E5G725_CANLF	65.23	19	2	2	Carbamidomethylation	17685	Dermatopontin (Fragment) OS=Canis lupus familiaris GN=DPT PE=2 SV=1
tr|Q8MJD1|Q8MJD1_CANLF	59.52	10	3	3	Carbamidomethylation; Carbamidomethylation (DHKE X@N-term); Carbamylation	29921	Neutrophil elastase OS=Canis lupus familiaris GN=ELA2 PE=2 SV=1
O02678|PGS1_CANLF	44.97	5	2	2	Carbamidomethylation; Deamidation (NQ)	41566	Biglycan OS=Canis lupus familiaris GN=BGN PE=2 SV=1
tr|G1K2D8|G1K2D8_CANLF	44.97	5	2	2	Carbamidomethylation; Deamidation (NQ)	41895	Biglycan OS=Canis lupus familiaris GN=BGN PE=4 SV=1
tr|F1PCE8|F1PCE8_CANLF	43.53	16	3	3	Carbamidomethylation; Oxidation or Hydroxylation; Mutation	26278	Uncharacterized protein OS=Canis lupus familiaris GN=LOC475521 PE=3 SV=1
P06871|TRY1_CANLF	43.53	16	3	3	Carbamidomethylation; Oxidation or Hydroxylation; Mutation	26170	Cationic trypsin OS=Canis lupus familiaris PE=2 SV=1
P19540|FA9_CANLF	43.12	3	1	1	Carbamidomethylation	50828	Coagulation factor IX OS=Canis lupus familiaris GN=F9 PE=1 SV=1
tr|G1K2D7|G1K2D7_CANLF	43.12	3	1	1	Carbamidomethylation	51765	Coagulation factor IX OS=Canis lupus familiaris GN=F9 PE=3 SV=1
tr|E2R917|E2R917_CANLF	41.15	2	1	1		59521	Uncharacterized protein OS=Canis lupus familiaris GN=KRT75 PE=3 SV=2
tr|F1PVL5|F1PVL5_CANLF	41.15	2	1	1		57562	Uncharacterized protein OS=Canis lupus familiaris GN=KRT79 PE=3 SV=2
tr|E2R8Z5|E2R8Z5_CANLF	41.15	2	1	1		62730	Uncharacterized protein OS=Canis lupus familiaris GN=KRT5 PE=3 SV=2
tr|L7N094|L7N094_CANLF	41.15	2	1	1		65431	Uncharacterized protein OS=Canis lupus familiaris GN=KRT3 PE=3 SV=1
tr|F1PG05|F1PG05_CANLF	39.71	5	2	1	Oxidation or Hydroxylation; Mutation	50343	Uncharacterized protein OS=Canis lupus familiaris GN=COL2A1 PE=4 SV=2
tr|F1PHX8|F1PHX8_CANLF	38.25	2	3	3	Oxidation (M); Oxidation or Hydroxylation; Mutation	179905	Uncharacterized protein OS=Canis lupus familiaris GN=COL5A1 PE=4 SV=2
tr|E0W6Z3|E0W6Z3_CANLF	37.76	5	1	1	Carbamidomethylation	20246	Insulin-like growth factor 2 splice variant 1 OS=Canis lupus familiaris PE=2 SV=1
tr|E0W6Z5|E0W6Z5_CANLF	37.76	5	1	1	Carbamidomethylation	20583	Insulin-like growth factor 2 splice variant 2 OS=Canis lupus familiaris PE=2 SV=1
tr|J9NYS6|J9NYS6_CANLF	37.76	5	1	1	Carbamidomethylation	20811	Uncharacterized protein OS=Canis lupus familiaris GN=IGF2 PE=3 SV=1
tr|F1PBX5|F1PBX5_CANLF	37.76	5	1	1	Carbamidomethylation	21481	Uncharacterized protein OS=Canis lupus familiaris GN=IGF2 PE=3 SV=2
tr|J9P961|J9P961_CANLF	37.76	3	1	1	Carbamidomethylation	28668	Uncharacterized protein OS=Canis lupus familiaris GN=IGF2 PE=3 SV=1
tr|L7N095|L7N095_CANLF	37.46	2	1	1		60709	Uncharacterized protein OS=Canis lupus familiaris GN=KRT5 PE=3 SV=1
tr|F1PTS8|F1PTS8_CANLF	37.46	2	1	1		60670	Uncharacterized protein OS=Canis lupus familiaris GN=LOC486523 PE=3 SV=1
tr|E2R489|E2R489_CANLF	37.01	2	1	1		63372	Uncharacterized protein OS=Canis lupus familiaris GN=KRT84 PE=3 SV=1
tr|F1PRB0|F1PRB0_CANLF	37.01	2	1	1		50884	Uncharacterized protein OS=Canis lupus familiaris GN=LOC486530 PE=3 SV=2
tr|A0A0S1U081|A0A0S1U081_CANLF	37.01	6	1	1		21958	Glial fibrillary acidic protein transcript variant gamma OS=Canis lupus familiaris GN=GFAP PE=2 SV=1
tr|A0A0S1U0J7|A0A0S1U0J7_CANLF	37.01	3	1	1		49502	Glial fibrillary acidic protein transcript variant delta/epsilon OS=Canis lupus familiaris GN=GFAP PE=2 SV=1
tr|A0A0S1U281|A0A0S1U281_CANLF	37.01	3	1	1		50028	Glial fibrillary acidic protein transcript variant alpha OS=Canis lupus familiaris GN=GFAP PE=2 SV=1
tr|E2RS09|E2RS09_CANLF	37.01	3	1	1		50017	Uncharacterized protein OS=Canis lupus familiaris GN=GFAP PE=3 SV=1
tr|E2R2C8|E2R2C8_CANLF	37.01	2	1	1		50602	Uncharacterized protein OS=Canis lupus familiaris GN=KRT80 PE=3 SV=1
tr|A0A0S1U0N3|A0A0S1U0N3_CANLF	37.01	2	1	1		54323	Glial fibrillary acidic protein transcript variant kappa OS=Canis lupus familiaris GN=GFAP PE=2 SV=1
tr|F1PW98|F1PW98_CANLF	37.01	2	1	1		54989	Uncharacterized protein OS=Canis lupus familiaris GN=KRT8 PE=3 SV=2
tr|F1PG69|F1PG69_CANLF	27.59	3	2	2	Oxidation or Hydroxylation	138779	Uncharacterized protein OS=Canis lupus familiaris GN=COL3A1 PE=4 SV=2
tr|J9P0L0|J9P0L0_CANLF	27.59	3	2	2	Oxidation or Hydroxylation	138441	Uncharacterized protein OS=Canis lupus familiaris GN=COL3A1 PE=4 SV=1
tr|J9P4Q9|J9P4Q9_CANLF	26.21	4	1	1	Mutation	50396	Uncharacterized protein OS=Canis lupus familiaris GN=KRT15 PE=3 SV=1
tr|E2R8Q7|E2R8Q7_CANLF	26.21	5	1	1	Mutation	49223	Uncharacterized protein OS=Canis lupus familiaris GN=KRT15 PE=3 SV=2
tr|F1PHM5|F1PHM5_CANLF	22.82	0	1	1		393828	Uncharacterized protein OS=Canis lupus familiaris GN=HSPG2 PE=4 SV=2
tr|J9NRJ0|J9NRJ0_CANLF	22.82	0	1	1		467861	Uncharacterized protein OS=Canis lupus familiaris GN=HSPG2 PE=4 SV=1
tr|Q597P9|Q597P9_CANLF	20.24	2	1	1	Carbamidomethylation; Oxidation (M); Oxidation or Hydroxylation	164608	Collagen type IV alpha 4 chain OS=Canis lupus familiaris GN=COL4A4 PE=2 SV=1
tr|F1PM99|F1PM99_CANLF	20.24	2	1	1	Carbamidomethylation; Oxidation (M); Oxidation or Hydroxylation	164735	Uncharacterized protein OS=Canis lupus familiaris GN=COL4A4 PE=3 SV=2
tr|J9NZN4|J9NZN4_CANLF	20.24	2	1	1	Carbamidomethylation; Oxidation (M); Oxidation or Hydroxylation	164606	Uncharacterized protein OS=Canis lupus familiaris GN=COL4A4 PE=3 SV=1
